# Supplementary material for: Transcriptional adaptation in Caenorhabditis elegans
Source: eLife journal article supplement (doi:10.7554/elife.50014), 2020-01-17
Supplement: fig1-data2 [file elife-50014-fig1-data2-v1.pdf]

| target    | <i>act-1</i> |            | <i>act-2</i> |            | <i>act-4</i> |            |
|-----------|--------------|------------|--------------|------------|--------------|------------|
| sample    | WT           | <i>ptc</i> | WT           | <i>ptc</i> | WT           | <i>ptc</i> |
| dCt value | 1.8          | 1.6        | 0.86         | 0.79       | -1.7         | 0.2        |

**Figure 1- source data 2.**
