# Supplementary material for: Transcriptional adaptation in Caenorhabditis elegans
Source: eLife journal article supplement (doi:10.7554/elife.50014), 2020-01-17
Supplement: fig3-data1 [file elife-50014-fig3-data1-v1.pdf]

| <b>Gene</b>     | <b>methods</b>                               |
|-----------------|----------------------------------------------|
| <i>F21C10.7</i> | Panther, GeneACeDB-Compara, WormBase-Compara |
| <i>F32D8.1</i>  | TreeFam                                      |
| <i>R06A10.4</i> | TreeFam                                      |
| <i>cmk-1</i>    | TreeFam                                      |
| <i>dapk-1</i>   | TreeFam                                      |
| <i>dim-1</i>    | Panther                                      |
| <i>him-4</i>    | GeneACeDB-Compara, WormBase-Compara          |
| <i>igcm-2</i>   | GeneACeDB-Compara                            |
| <i>igdb-1</i>   | Panther                                      |
| <i>igdb-2</i>   | Panther                                      |
| <i>ketn-1</i>   | Panther, GeneACeDB-Compara, WormBase-Compara |
| <i>mlck-1</i>   | TreeFam                                      |
| <i>rig-1</i>    | Panther                                      |
| <i>sax-3</i>    | GeneACeDB-Compara, WormBase-Compara          |
| <i>sax-7</i>    | Panther                                      |
| <i>unc-22</i>   | Panther, GeneACeDB-Compara                   |
| <i>unc-89</i>   | WormBase-Compara                             |

**Figure 3-source data 1**
