# Supplementary material for: Transcriptional adaptation in Caenorhabditis elegans
Source: eLife journal article supplement (doi:10.7554/elife.50014), 2020-01-17
Supplement: fig3-data2 [file elife-50014-fig3-data2-v1.pdf]

| target    | <i>unc-89</i> |             |             |             |          | <i>sax-3</i> |             |             |             |          |
|-----------|---------------|-------------|-------------|-------------|----------|--------------|-------------|-------------|-------------|----------|
| sample    | WT            | <i>ptc1</i> | <i>ptc2</i> | <i>ptc3</i> | $\Delta$ | WT           | <i>ptc1</i> | <i>ptc2</i> | <i>ptc3</i> | $\Delta$ |
| dCt value | -2.7          | -2.1        | -2.1        | -1.8        | -28.3    | 1.6          | 0.4         | 1.4         | 1.4         | 1.7      |

**Figure 3-source data 2.**
