# Supplementary material for: Transcriptional adaptation in Caenorhabditis elegans
Source: eLife journal article supplement (doi:10.7554/elife.50014), 2020-01-17
Supplement: fig3-data3 [file elife-50014-fig3-data3-v1.pdf]

| allele  | <i>ptc1</i>                                            | <i>ptc2</i> | <i>ptc3</i> | <i>ptc1</i>                                  | <i>ptc1</i> | <i>ptc3</i> |
|---------|--------------------------------------------------------|-------------|-------------|----------------------------------------------|-------------|-------------|
| isoform | distance from the PTC to the exon-intron junction (bp) |             |             | distance from the PTC to the stop codon (bp) |             |             |
| a       | 283                                                    | 133         | -           | 666                                          | 234         | -           |
| b       | 283                                                    | 133         | 212         | 5013                                         | 4581        | 4039        |
| c       | -                                                      | -           | 212         | -                                            | -           | 4011        |
| d       | -                                                      | -           | -           | -                                            | -           | -           |
| e       | 283                                                    | 133         | -           | 666                                          | 234         | -           |
| f       | 283                                                    | 133         | 212         | 5013                                         | 4581        | 4011        |
| g       | 283                                                    | 133         | 212         | 5013                                         | 4581        | 4011        |
| h       | 283                                                    | 133         | 212         | 5013                                         | 4581        | 4011        |
| i       | 283                                                    | 133         | 212         | 5013                                         | 4581        | 4011        |
| j       | 283                                                    | 133         | 212         | 5013                                         | 4581        | 4011        |
| k       | 283                                                    | 133         | 212         | 5013                                         | 4581        | 4011        |
| l       | 283                                                    | 133         | -           | 666                                          | 234         | -           |
| m       | 283                                                    | 133         | 212         | 5013                                         | 4581        | 4011        |
| n       | 283                                                    | 133         | 212         | 5013                                         | 4581        | 4011        |
| o       | 283                                                    | 133         | -           | 666                                          | 234         | -           |
| p       | 283                                                    | 133         | 212         | 5013                                         | 4581        | 4011        |

**Figure 3-source data 3.**
