# Supplementary material for: Transcriptional adaptation in Caenorhabditis elegans
Source: eLife. 2020 Jan 17;9:e50014. doi: 10.7554/eLife.50014 (PMC6968918; doi:10.7554/eLife.50014)
Supplement: Figure 4—source data 1. [file elife-50014-fig4-data1.xlsx]

## Sheet: Sheet1
		act-5		act-3			unc-89				sax-3
Gene	RNAi clone	WT	dt2019	WT	dt2019	Transcriptional adaptation phenotype	WT	gk469156	gk506355	gk509355	WT	gk469156	gk506355	gk509355	Transcriptional adaptation phenotype
rsp-8	mv_C18D11.4	-0.8	-5.4	-3.6	-3.6	Yes	2.1	2.7	2.7	3.04	6.44	5.3	6.26	6.3	No
	sjj2_C18D11.4	-0.1	-5.1	-2.8	-2.8	Yes	-2.6	-2.2	-2.4	-1.5	2.5	3.1	2.8	3.08	No
rsp-6	mv_C33H5.12	1.5	-0.02	5.8	6.8	No	Nt	Nt	Nt	Nt	Nt	Nt	Nt	Nt	Nt
	sjj2_C33H5.12	1.5	-0.04	5.8	6.6	No	-1	2.5	2.1	2.3	-0.4	-2.4	-2.6	-2.4	No
rsp-1	mv_W02B12.3	Nt	Nt	Nt	Nt	Nt	-3.1	3.1	2.1	1.5	0.19	-1.4	-2.1	-1.9	No
	sjj2_W02B12.3	Nt	Nt	Nt	Nt	Nt	-0.7	2.5	0.7	1.4	-0.16	-0.95	-2.3	-2.6	No
rsp-7	mv_D2089.1	Nt	Nt	Nt	Nt	Nt	-0.8	2.3	0.62	1.26	-0.14	-1	-2.4	-2.7	No
	sjj2_D2089.1	Nt	Nt	Nt	Nt	Nt	-0.8	2.4	1.41	0.83	-0.51	-1.48	-2.8	-2.6	No
spk-1	mv_B0464.5	-0.7	-0.7	-3.6	-3.6	Yes	-0.6	0.02	0.02	0.2	3.7	2.5	3.5	3.6	Yes
	sjj2_B0464.5	-0.02	-0.02	-2.9	-2.8	Yes	-1.8	-1.6	-1.9	-1.2	3.6	3.6	3.7	3.6	Yes
paxt-1	mv_R05D11.6	-0.7	-0.01	1.2	2.16	Yes	4.6	5.2	5.2	5.2	8.9	7.8	8.7	8.8	Yes
	sjj2_R05D11.6	-0.3	-0.23	0.6	2.17	Yes	0.2	0.3	0.1	0.7	5.6	5.6	5.5	5.6	Yes
hsp-4	mv_F43E2.8	1.6	-0.13	5.9	7	No	-3.6	2.6	1.6	1	-0.3	-1.9	-2.6	-2.4	No
	sjj2_F43E2.8	1.6	-0.4	5.8	6.4	No	-0.9	2.3	0.5	1.2	-0.4	-1.1	-2.5	-2.8	No
xrn-1	sjj2_Y39G8C.1	2.08	4.1	-1.9	-2.9	Yes	-1.9	-1.8	-1.8	-2.02	-5.9	-5.8	-6.01	-6	Yes
smg-2	mv_Y48G8AL.6	-2.01	-2.9	-4.5	-4.5	No	2.6	2.9	2.8	3.3	5.2	4.5	4.4	4.3	Yes
	sjj2_Y48G8AL.6	-4.5	-4.9	-3.2	-3.8	No	2.8	3.4	3.4	3.8	5.01	4.6	4.5	4.2	Yes
smg-4	sjj2_F46B6.3	-4.8	-5.2	-4.1	-4.5	No	2.7	2.9	3.1	3.2	5	4.6	4.3	4.7	Yes
smg-6	mv_Y54F10AL.2	-2.05	-2.1	-4.8	-4.8	Yes	-3.4	2.8	1.8	1.2	-0.11	-1.7	-2.4	-2.2	No
	sjj2_Y54F10AL.2	-1.95	-1.94	-4.7	-4.7	Yes	-0.6	2.6	0.8	1.5	-0.06	-0.85	-2.2	-2.5	No
hrpk-1	mv_F26B1.2	-1.5	0.4	-5.6	-6.6	No	Nt	Nt	Nt	Nt	Nt	Nt	Nt	Nt	Nt
	sjj2_F26B1.2	-1.2	0.7	-5.5	-6.1	No	1.5	3.4	3.2	3.5	5.3	4.5	4.7	4.7	No
drsh-1	mv_F26E4.10	-1.08	0.4	-5.3	-6.3	No	-2.7	-2.07	-2.6	-1.8	1.6	0.5	1.4	1.5	No
	sjj2_F26E4.10	-1.02	0.01	-5.2	-5.8	No	-7.1	-6	-5.8	-6.06	-1.7	-1.1	-1.02	-1.2	No
pash-1	mv_T22A3.5	-0.03	1.01	-4.25	-5.3	No	-0.2	1.1	1.02	1.3	0.1	-0.2	0.2	-0.1	No
	sjj2_T22A3.5	1.23	2.23	-2.9	-3.6	No	Nt	Nt	Nt	Nt	Nt	Nt	Nt	Nt	Nt
rrf-1	sjj2_F26A3.8	-2.13	-2.3	-1.73	-1.62	No	-0.07	0.6	0.6	0.8	4.24	3.1	4.07	4.13	No
wago-1	mv_ R06C7.1	2.5	4.7	1.52	0.02	No	-0.6	2.3	0.64	1.2	-0.14	-0.9	-2.2	-2.6	No
	sjj2_ R06C7.1	1.3	2.5	2.1	0.9	No	-0.4	2.6	1.62	1.02	-0.3	-1.18	-2.5	-2.25	No
wago-4	mv_F58G1.1	-5	1.22	-2.5	-4.3	No	2.1	2.7	2.7	3.04	6.44	5.3	6.26	6.3	No
	sjj2_F58G1.1	-2.7	-2.1	-3.01	-4.7	No	-2.7	-2.1	-2.4	-1.77	3.1	3	3	3.08	No
rrf-3	sjj2_F10B5.7	-0.7	-0.1	-2.7	-2.8	Yes	5.5	6.3	6.5	6.6	7.6	7.8	7.6	7.3	Yes
zbp-1	mv_M88.5	-0.6	1.1	-4.8	-5.8	No	2.7	3.8	3.7	3.5	2	0.3	0.4	-1.1	No
	sjj2_M88.5	-0.5	1.54	-4.43	-5.09	No	Nt	Nt	Nt	Nt	Nt	Nt	Nt	Nt	Nt
dcr-1	sjj2_K12H4.8	1.47	0.51	-2.8	-3.4	Yes	2.4	3.9	4.1	3.9	5.6	5.5	5.6	5.4	Yes
rde-4	mv_T20G5.11	4.38	5.67	4.98	3.8	No	-2.07	-1.4	-1.4	-1.15	2.2	1.1	2.07	2.13	No
	sjj2_T20G5.11	4.8	5.3	4.4	3.4	No	-6.4	-6.3	-6.6	-6	2.1	-1.03	-1.1	-1.2	No
kdin-1	mv_F36H1.2	-1.5	0.2	-5.7	-5.7	No	-2.6	-2	-1.9	-2	1.6	0.5	1.5	1.4	No
sago-1	mv_K12B6.1	2.96	5.32	4.05	2.52	No	-0.7	2.4	0.72	1.36	-0.04	-0.9	-2.3	-2.6	No
	sjj2_K12B6.1	3.7	4.8	4.43	3.54	No	-0.5	2.7	1.71	1.13	-0.21	-1.18	-2.5	-2.3	No
rde-1	mv_K08H10.7	-5.3	-6.4	-5.1	-5.8	No	-0.6	2.6	0.8	1.46	0.06	-0.85	-2.2	-2.5	No
	sjj2_K08H10.7	-2	-0.03	-1	-0.96	No	-0.4	2.8	1.8	1.23	-0.1	-1.7	-2.4	-4	No
ergo-1	sjj2_R09A1.1	-4.5	-3.4	-6.5	-6.6	Yes	0.94	0.7	0.7	0.6	1.4	0.8	0.9	1	Yes
nrde-3	mv_R04A9.2	-5.6	-3.4	-6.6	-6.4	Yes	0.26	4.1	1.05	1.16	0.54	0.27	0.15	0.21	Yes
	sjj2_R04A9.2	-4.6	-3.4	-6.5	-6.5	Yes	-0.27	3.1	1.4	1.8	0.97	1.4	0.5	0.5	Yes
