# Supplementary material for: Transcriptional adaptation in Caenorhabditis elegans
Source: eLife. 2020 Jan 17;9:e50014. doi: 10.7554/eLife.50014 (PMC6968918; doi:10.7554/eLife.50014)
Supplement: Figure 5—source data 1. [file elife-50014-fig5-data1.xlsx]

## Sheet: Sheet1
		act-5		act-3			unc-89				sax-3
Gene	allele	single mutant	double mutant (dt2019)	WT	dt2019	Transcriptional adaptation phenotype	WT	double mutant (gk469156)	double mutant (gk506355)	double mutant (gk509355)	single mutant	double mutant (gk469156)	double mutant (gk506355)	double mutant (gk509355)	Transcriptional adaptation phenotype
smg-2	e2008	5.4	6.8	1.3	0.5	No	Nt	Nt	Nt	Nt	Nt	Nt	Nt	Nt	Nt
smg-4	ma116	-2.5	-3	-3.07	-3.23	No	5.5	6.3	6.5	6.6	7.5	7.8	7.6	7.3	Yes
smg-6	r896	Nt	Nt	Nt	Nt	Nt	-0.5	2.74	1.71	1.06	-0.4	-0.95	-2.3	-2.55	No
ergo-1	gg100	3.5	5.5	-0.7	-0.6	Yes	2.9	6.6	3.1	3.75	3.55	3.4	2.65	2.4	Yes
nrde-3	gg66	1.9	3.1	-0.2	-0.8	No	1.3	2	2	2.2	1.5	1.2	0.1	-0.07	Yes
rrf-3	mg373	6.1	6.9	8.1	9.3	Yes	4.3	5.1	5.33	5.4	6.8	6.6	6.5	6.6	Yes
